# Supplementary material
Source: MDPI journal article supplement (https://www.mdpi.com/2073-4344/11/12/1429)
Supplement: s1 [file s1 › catalysts-1437909-supplementary.pdf]

# Kinetic Study on CO-Selective Methanation over Nickel-Based Catalysts for Deep Removal of CO from Hydrogen-Rich Reformate

Woohyun Kim, K. Khaja Mohaideen <sup>†</sup>, Dong Joo Seo <sup>\*</sup> and Wang Lai Yoon <sup>\*</sup>

Hydrogen Research Department, Hydrogen Energy Research Division,  
Korea Institute of Energy Research (KIER), 152 Gajeong-ro, Yuseong-gu, Daejeon 34129, Korea;  
wkim@kier.re.kr (W.K.); kkhaja@gmail.com (K.K.M.)

<sup>\*</sup> Correspondence: djseo@kier.re.kr (D.J.S.); wlyoon@kier.re.kr (W.L.Y.)

<sup>†</sup> Present affiliation: Department of Catalysis and Chemical Reaction Engineering,  
National Institute of Chemistry, 1000 Ljubljana, Slovenia.

**Abstract:** The CO-selective methanation process is considered as a promising CO removal process for compact fuel processors producing hydrogen, since the process selectively converts the trace of CO in the hydrogen-rich gas into methane without additional reactants. Two different types of efficient nickel-based catalysts, showing high activity and selectivity to the CO methanation reaction, were developed in our previous works; therefore, the kinetic models of the reactions over these nickel-based catalysts have been investigated adopting the mechanistic kinetic models based on the Langmuir chemisorption theory. In the methanation process, the product species can react with the reactant and also affect the adsorption/desorption of the molecules at the active sites. Thus, the kinetic parameter study should be carried out by global optimization handling all the rate equations for the plausible reactions at once. To estimate the kinetic parameters, an effective optimization algorithm combining both heuristic and deterministic methods is used due to the large solution space and the nonlinearity of the objective function. As a result, 14 kinetic parameters for each catalyst have been determined and the parameter sets for the catalysts have been compared to understand the catalytic characteristics.

**Keywords:** CO-selective methanation; nickel catalysts; kinetic parameters; genetic algorithm; parameter estimation

**Citation:** Kim, W.; Mohaideen, K.K.; Seo, D.J.; Yoon, W.L. Kinetic Study on CO Selective Methanation over Nickel-Based Catalysts for Deep Removal of CO from Hydrogen-Rich Reformate. *Catalysts* **2021**, *11*, 1429. <https://doi.org/10.3390/catal11121429>

Academic Editor: Anastasia Macario and Jaroslaw Polanski

Received: 11 October 2021

Accepted: 20 November 2021

Published: 24 November 2021

**Publisher's Note:** MDPI stays neutral with regard to jurisdictional claims in published maps and institutional affiliations.

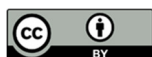

**Copyright:** © 2021 by the authors. Licensee MDPI, Basel, Switzerland. This article is an open access article distributed under the terms and conditions of the Creative Commons Attribution (CC BY) license (<https://creativecommons.org/licenses/by/4.0/>).

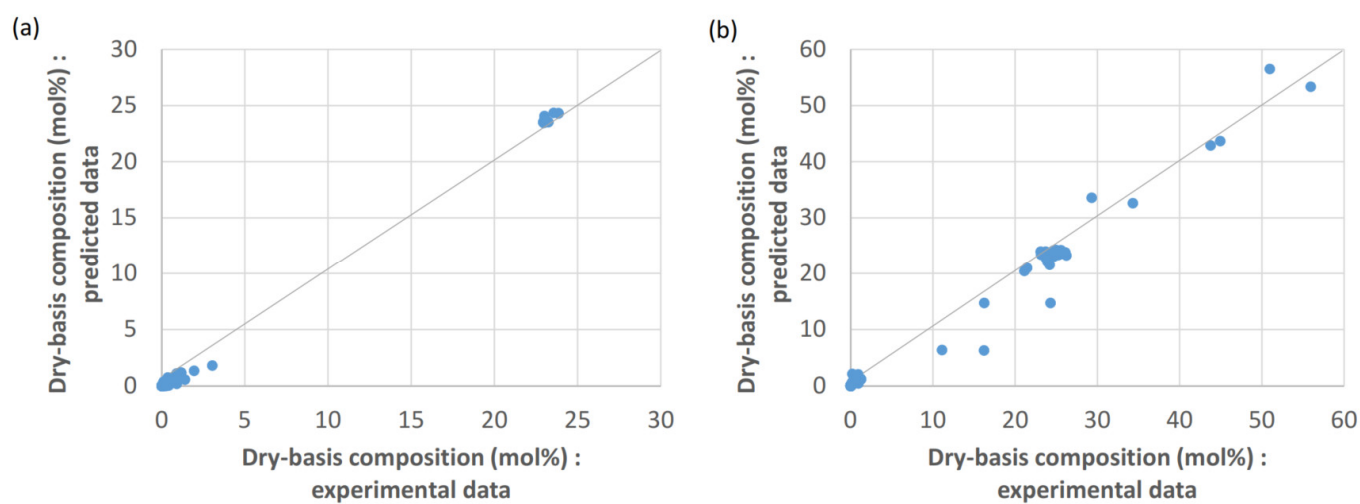

**Figure S1.** Parity plots and objective function values for both catalysts (a) Ir/Ni-MgO/ $\gamma$ -alumina and (b)  $\text{Ni}_{0.5}\text{Zr}_{0.5}\text{O}_2$ .
